# Supplementary material for: Construction of Escherichia coli Mutant with Decreased Endotoxic Activity by Modifying Lipid A Structure
Source: Mar Drugs. 2015 May 27;13(6):3388–406. doi: 10.3390/md13063388 (PMC4483635; doi:10.3390/md13063388)
Supplement: Supplementary File 1 [file marinedrugs-13-03388-s001.pdf]

## Supplementary Information

**Table S1.** Cytokine concentrations in culture supernatants of RAW264.7 cells and THP1 cells stimulated by different concentrations of lipopolysaccharide (LPS) sample from *E. coli* BL21 (DE3) and mutant strains.

| Cells                                           | LPS Concentration<br>(pM) | BL21 (DE3)        | S001<br>( $\Delta msbB28 \Delta pagP38$ ) | S002<br>(S001 + <i>pagL</i> ) | S003<br>(S001 + <i>lpxE</i> ) | S004<br>(S001 + <i>pagL</i> and <i>lpxE</i> ) | PBS           |
|-------------------------------------------------|---------------------------|-------------------|-------------------------------------------|-------------------------------|-------------------------------|-----------------------------------------------|---------------|
| TNF- $\alpha$ from<br>RAW264.7 cells<br>(pg/mL) | 10                        | 2300 $\pm$ 613    | 1075 $\pm$ 267                            | 296 $\pm$ 97                  | 1319 $\pm$ 219                | 274 $\pm$ 142                                 | 53 $\pm$ 10   |
|                                                 | 10 <sup>2</sup>           | 8226 $\pm$ 923    | 4492 $\pm$ 1219                           | 568 $\pm$ 147                 | 3266 $\pm$ 763                | 627 $\pm$ 118                                 | 21 $\pm$ 7    |
|                                                 | 10 <sup>3</sup>           | 16,293 $\pm$ 2280 | 7648 $\pm$ 1684                           | 2051 $\pm$ 297                | 5236 $\pm$ 953                | 2080 $\pm$ 335                                | 44 $\pm$ 14   |
|                                                 | 10 <sup>4</sup>           | 20,904 $\pm$ 2480 | 16,972 $\pm$ 1514                         | 6825 $\pm$ 767 †              | 11,677 $\pm$ 1470 †           | 4427 $\pm$ 821 *†                             | 65 $\pm$ 15   |
| IL-12 from THP 1<br>cells (pg/mL)               | 10                        | 19.4 $\pm$ 6.9    | 13.5 $\pm$ 5.2                            | 12.9 $\pm$ 2.4                | 10.6 $\pm$ 0.9                | 15.4 $\pm$ 2.7                                | 5.3 $\pm$ 2.1 |
|                                                 | 10 <sup>2</sup>           | 59.6 $\pm$ 16.7   | 16.1 $\pm$ 2.1                            | 15.5 $\pm$ 2.1                | 9.6 $\pm$ 2.0                 | 17.0 $\pm$ 2.6                                | 4.6 $\pm$ 1.0 |
|                                                 | 10 <sup>3</sup>           | 156.6 $\pm$ 28.7  | 26.7 $\pm$ 8.2                            | 14.7 $\pm$ 1.3                | 21.3 $\pm$ 2.5                | 21.9 $\pm$ 1.0                                | 4.0 $\pm$ 1.5 |
|                                                 | 10 <sup>4</sup>           | 266.0 $\pm$ 34.4  | 24.2 $\pm$ 10.6 **                        | 26.0 $\pm$ 4.1 **             | 24.4 $\pm$ 3.4 **             | 23.6 $\pm$ 4.2 **                             | 3.2 $\pm$ 2.6 |

One-way analysis of variance was used to evaluate differences in cytokine concentrations. Significant differences between the parental strain groups and other mutant strain groups stimulated by LPS were shown. †  $p < 0.01$  compared with S001; \*  $p < 0.05$  compared with S002; \*\*  $p < 0.01$  compared with parental strain BL21 (DE3). The experiment were performed in triplicate, and data were shown as means  $\pm$  standard deviation, PBS group was negative control.
